# Supplementary material for: Evolution of the Karyopherin-β Family of Nucleocytoplasmic Transport Factors; Ancient Origins and Continued Specialization
Source: PubMed Central journal article supplement (PMC3083441; doi:10.1371/journal.pone.0019308), 2011-04-27

## Figure S1

Phylogenetic analysis for establishment of phylogeny of Karyopherin-beta family members. Numbers on trees are posterior probability (MrBayes) and bootstrap support (PhyML) values. Phylogenetic relationships were inferred only when supported by MrBayes (posterior probability >95%) and PhyML trees (bootstrap value >70%). A schematic of the inferred phylogeny is shown on this page and schematics of inferred relationships are shown for each pair of trees in (a-e) below.

| Species ID | Species                                                              |
|------------|----------------------------------------------------------------------|
| Hs         | <i>Homo sapiens</i>                                                  |
| Nv         | <i>Nematostella vectensis</i>                                        |
| At         | <i>Arabidopsis thaliana</i> (cultivar Columbia)                      |
| Pp         | <i>Physcomitrella patens</i> ssp <i>patens</i> ecotype Gransden 2004 |
| Ps         | <i>Phytophthora sojae</i>                                            |
| Pr         | <i>Phytophthora ramorum</i>                                          |
| Lm         | <i>Leishmania major</i>                                              |
| Tb         | <i>Trypanosoma brucei</i>                                            |

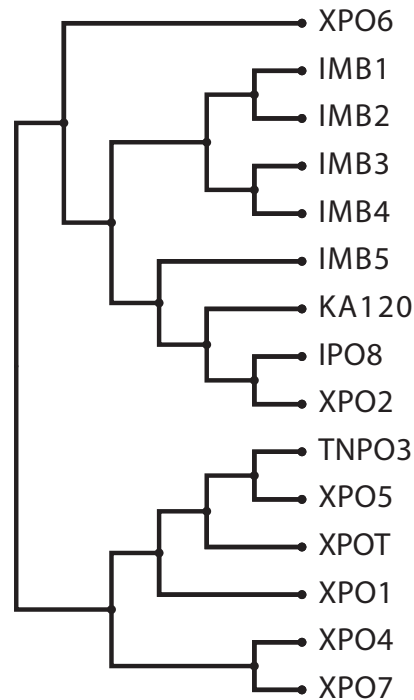

| short ID | long ID                | short ID | long ID                 |
|----------|------------------------|----------|-------------------------|
| Hs XPO6  | sp Q96QU8 XPO6 HUMAN   | Pp IPO8  | Phypa1 1 148110         |
| Nv XPO6  | Nemve1 205085          | Ps IPO8  | Physo1 1 134304         |
| Ps XPO6  | Physo1 1 130947        | Pr IPO8  | Phyra1 1 77342          |
| Pr XPO6  | Phyra1 1 78084         | Lm IPO8  | LmjF13.0640             |
| Hs IMB1  | sp Q14974 IMB1 HUMAN   | Tb IPO8  | Tb11.02.1720            |
| Nv IMB1  | Nemve1 182805          | Hs XPO2  | sp P55060-1 XPO2 HUMAN  |
| At IMB1  | tr Q9FJD4 Q9FJD4 ARATH | Nv XPO2  | Nemve1 185581           |
| Pp IMB1  | Phypa1 1 193928        | At XPO2  | sp Q9ZPY7 XPO2 ARATH    |
| Ps IMB1  | Physo1 1 129795        | Pp XPO2  | Phypa1 1 182124         |
| Pr IMB1  | Phyra1 1 73238         | Ps XPO2  | Physo1 1 134104         |
| Lm IMB1  | LmjF34.0490            | Pr XPO2  | Phyra1 1 81342          |
| Tb IMB1  | Tb10.70.4720           | Lm XPO2  | LmjF30.3390             |
| Hs IMB2  | sp Q92973 TNPO1 HUMAN  | Tb XPO2  | Tb927.6.4740            |
| Nv IMB2  | Nemve1 243273          | Hs TNPO3 | sp Q9Y5L0-1 TNPO3 HUMAN |
| At IMB2  | tr Q8H2D6 Q8H2D6 ARATH | Nv TNPO3 | Nemve1 174976           |
| Pp IMB2  | Phypa1 1 224057        | At TNPO3 | tr Q8GUL2 Q8GUL2 ARATH  |
| Ps IMB2  | Physo1 1 109625        | Pp TNPO3 | Phypa1 1 163909         |
| Pr IMB2  | Phyra1 1 72223         | Ps TNPO3 | Physo1 1 133433         |
| Lm IMB2  | LmjF35.2330            | Pr TNPO3 | Phyra1 1 80755          |
| Tb IMB2  | Tb09.211.4360          | Hs XPO5  | sp Q9HAV4-1 XPO5 HUMAN  |
| Hs IMB3  | tr Q86XC7 Q86XC7 HUMAN | At XPO5  | tr Q0WP44 Q0WP44 ARATH  |
| Nv IMB3  | Nemve1 235624          | Pp XPO5  | Phypa1 1 137344         |
| At IMB3  | tr Q93VS8 Q93VS8 ARATH | Ps XPO5  | Physo1 1 140752         |
| Pp IMB3  | Phypa1 1 169387        | Pr XPO5  | Phyra1 1 81240          |
| Ps IMB3  | Physo1 1 139352        | Hs XPOT  | sp O43592 XPOT HUMAN    |
| Pr IMB3  | Phyra1 1 78209         | Nv XPOT  | Nemve1 241098           |
| Lm IMB3  | LmjF32.2150            | At XPOT  | tr Q7PC79 Q7PC79 ARATH  |
| Tb IMB3  | Tb11.01.7010           | Pp XPOT  | Phypa1 1 134096         |
| Hs IMB4  | sp Q8TEX9-2 IPO4 HUMAN | Hs XPO1  | sp O14980 XPO1 HUMAN    |
| Nv IMB4  | Nemve1 248390          | Nv XPO1  | Nemve1 182854           |
| At IMB4  | tr Q8W498 Q8W498 ARATH | At XPO1  | tr Q94IV0 Q94IV0 ARATH  |
| Pp IMB4  | Phypa1 1 217532        | Pp XPO1  | Phypa1 1 163030         |
| Ps IMB4  | Physo1 1 134803        | Ps XPO1  | Physo1 1 109057         |
| Pr IMB4  | Phyra1 1 81386         | Pr XPO1  | Phyra1 1 72043          |
| Lm IMB4  | LmjF07.0720            | Lm XPO1  | LmjF32.1100             |
| Tb IMB4  | Tb11.01.8030           | Tb XPO1  | Tb11.01.5940            |
| Hs IMB5  | sp Q96P70 IPO9 HUMAN   | Hs XPO4  | sp Q9C0E2 XPO4 HUMAN    |
| Nv IMB5  | Nemve1 106835          | At XPO4  | tr Q9M838 Q9M838 ARATH  |
| At IMB5  | tr Q9C662 Q9C662 ARATH | Pp XPO4  | Phypa1 1 148515         |
| Pp IMB5  | Phypa1 1 125599        | Ps XPO4  | Physo1 1 143710         |
| Ps IMB5  | Physo1 1 143359        | Pr XPO4  | Phyra1 1 77078          |
| Pr IMB5  | Phyra1 1 72932         | Hs XPO7  | sp Q9UIA9 XPO7 HUMAN    |
| Hs KA120 | sp Q9UI26 IPO11 HUMAN  | Nv XPO7  | Nemve1 30364            |
| Nv KA120 | Nemve1 248196          | At XPO7  | tr Q9LHS4 Q9LHS4 ARATH  |
| At KA120 | tr Q9SR95 Q9SR95 ARATH | Pp XPO7  | Phypa1 1 154305         |
| Pp KA120 | Phypa1 1 152314        | Ps XPO7  | Physo1 1 141370         |
| Ps KA120 | Physo1 1 142102        | Pr XPO7  | Phyra1 1 74843          |
| Pr KA120 | Phyra1 1 76869         | Lm XPO7a | LmjF26.1900             |
| Hs IPO8  | sp O15397 IPO8 HUMAN   | Tb XPO7a | Tb09.160.1250           |
| Nv IPO8  | Nemve1 177781          | Lm XPO7b | LmjF10.1200             |
| At IPO8  | tr Q27GK2 Q27GK2 ARATH | Tb XPO7b | Tb927.8.4660            |

(a)

Three supergroups, all 15 subfamilies.

Conclusions:

XPO4 & XPO7 are derived from a common ancestor.

(IMB1, IMB2, IMB3, IMB4) and (IMB5, KA120, IPO8, XPO2) form clades and are derived from a common ancestor (full branch order not established)

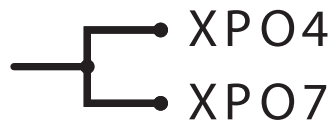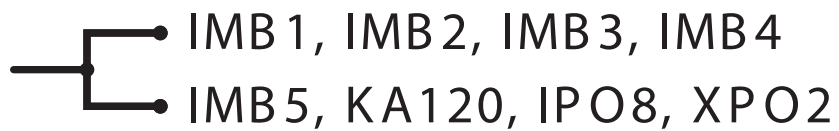

(a) MrBayes

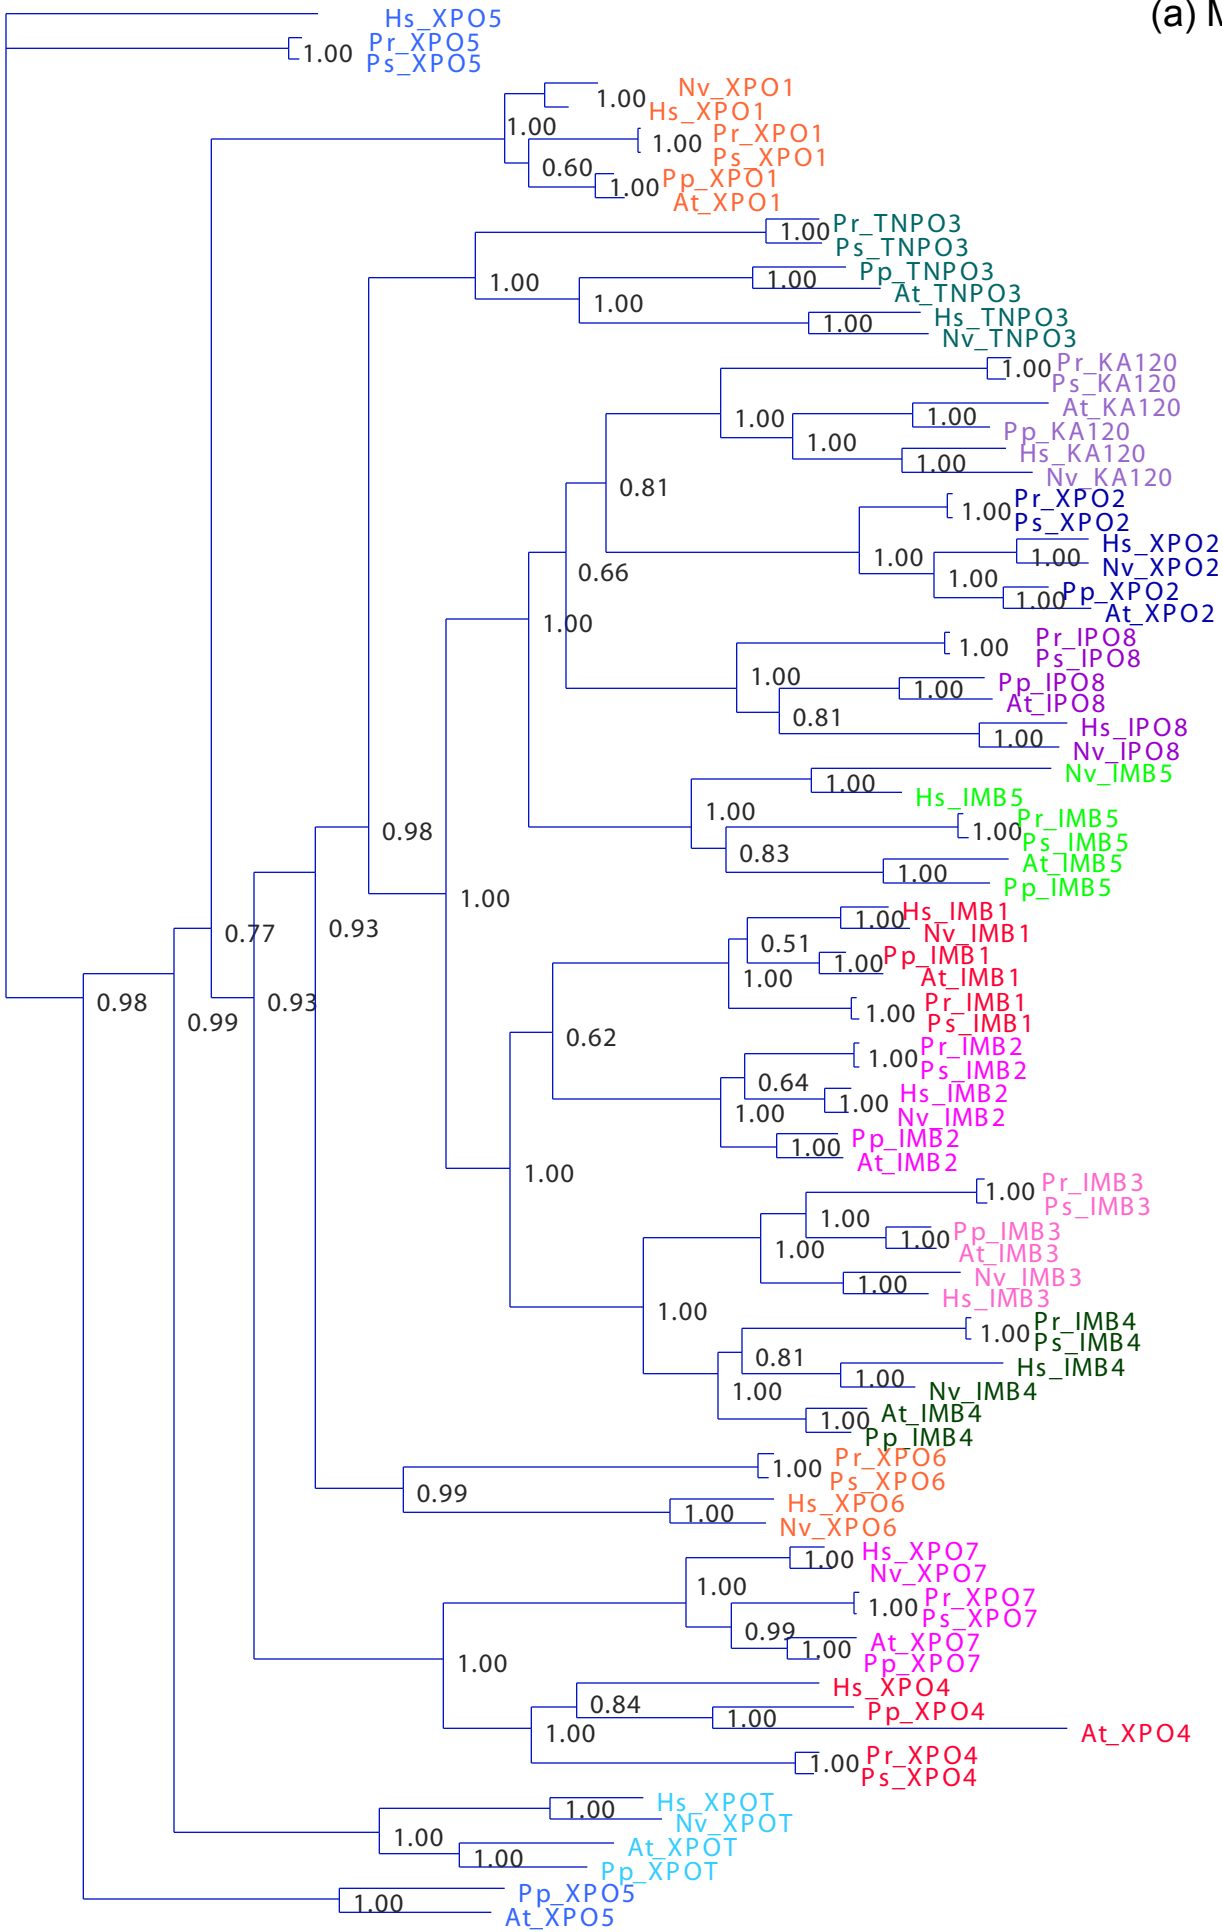

(a) PhyML

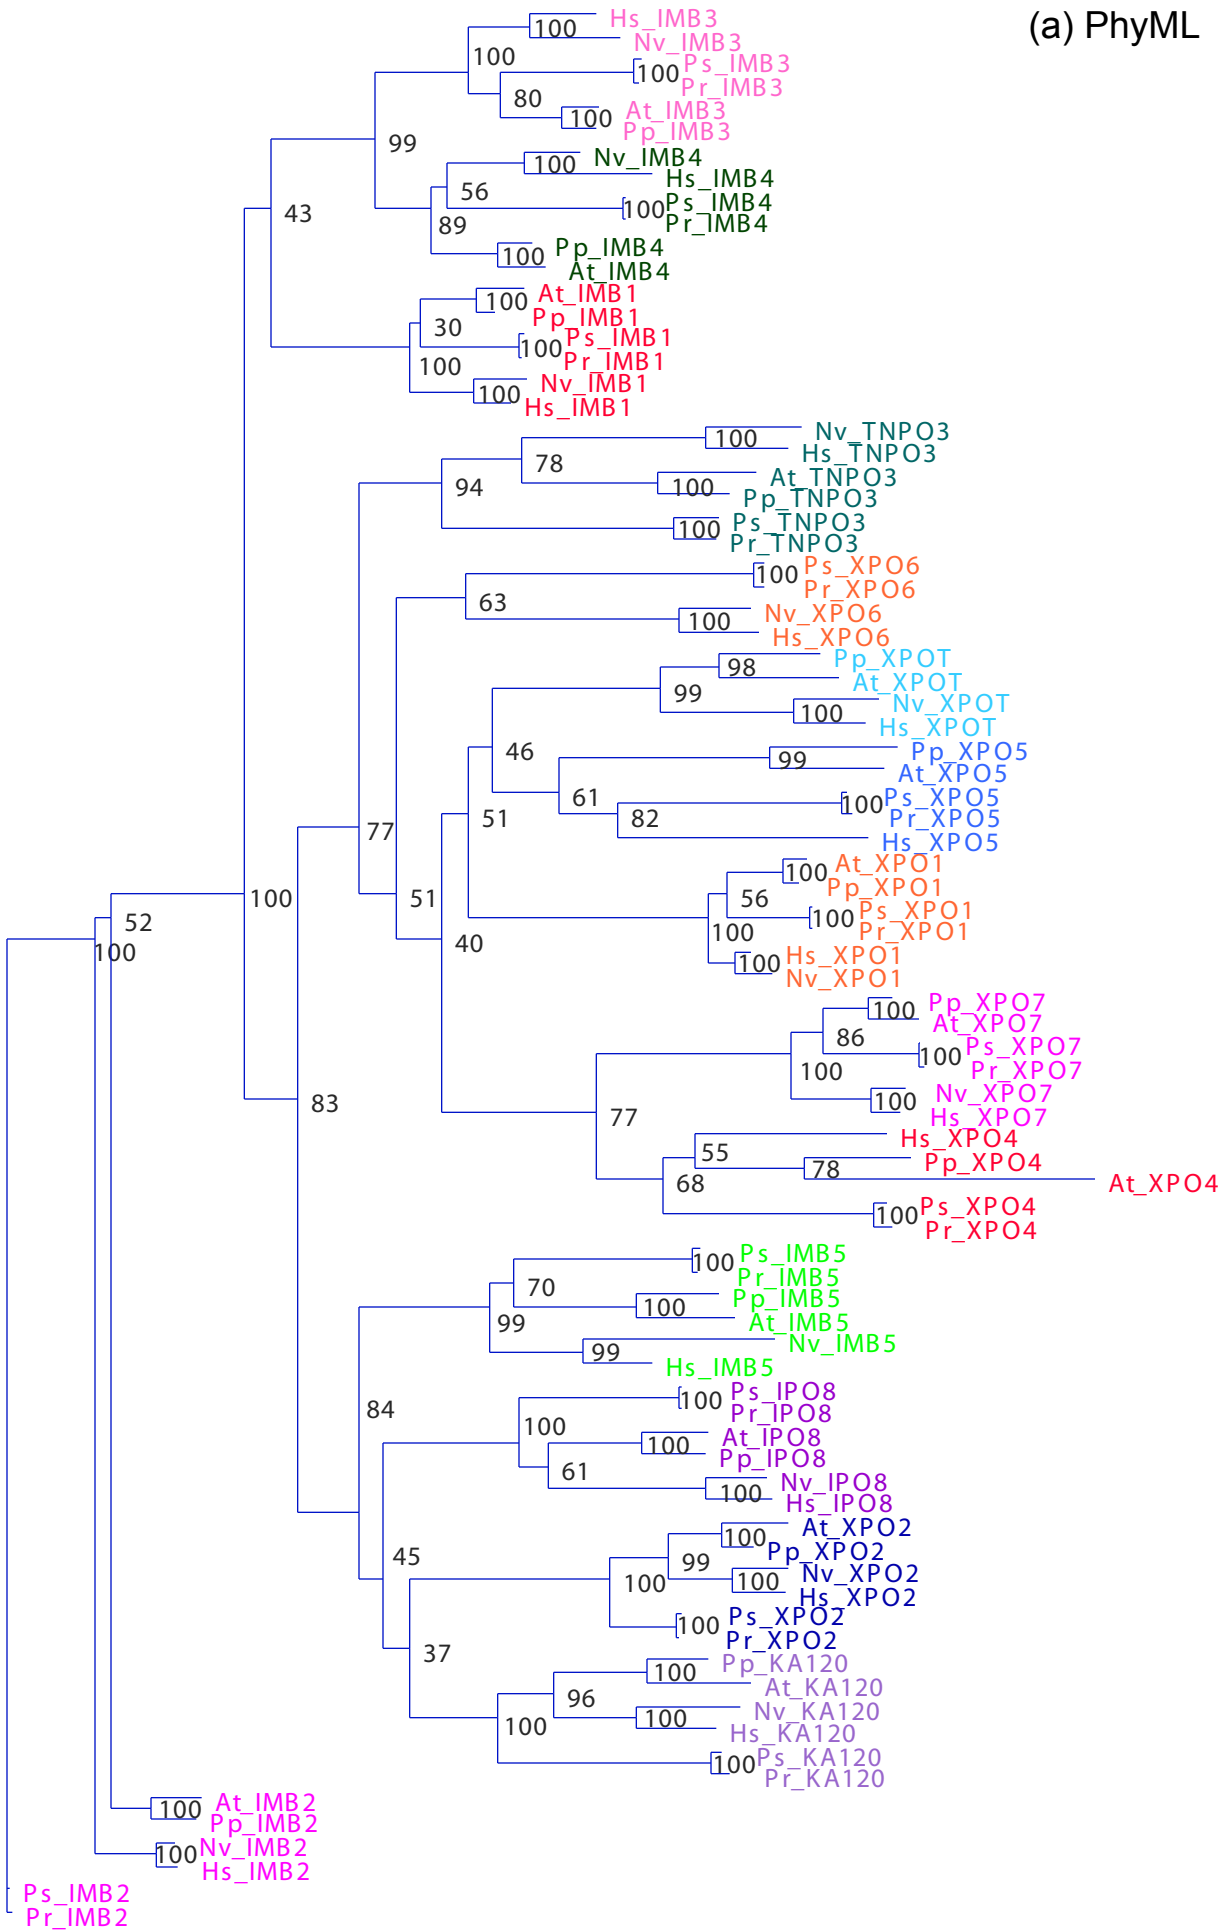

(b)

The subfamily representation in (a) was split in order to investigate branching order and ancestral relationships between family members.

Four supergroups, selected subfamilies.

(IMB1, IMB2, IMB3, IMB4, IMB5, KA120, IPO8, XPO2) only.

Conclusion:

branch order for IMB1, IMB2, IMB3, IMB4, IMB5, KA120, IPO8, XPO2 established.

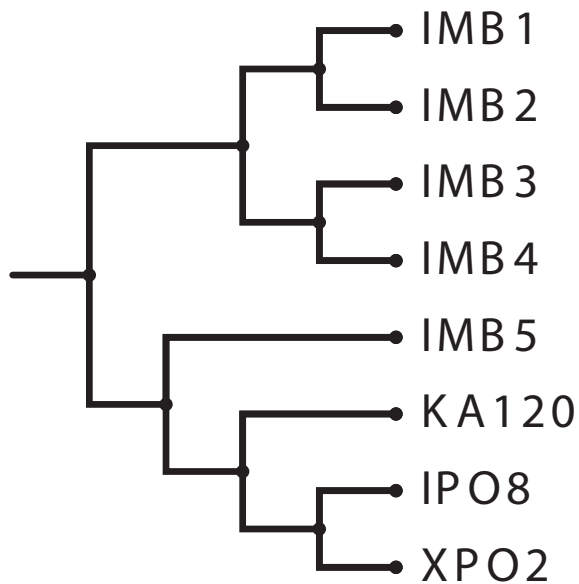

(b) MrBayes

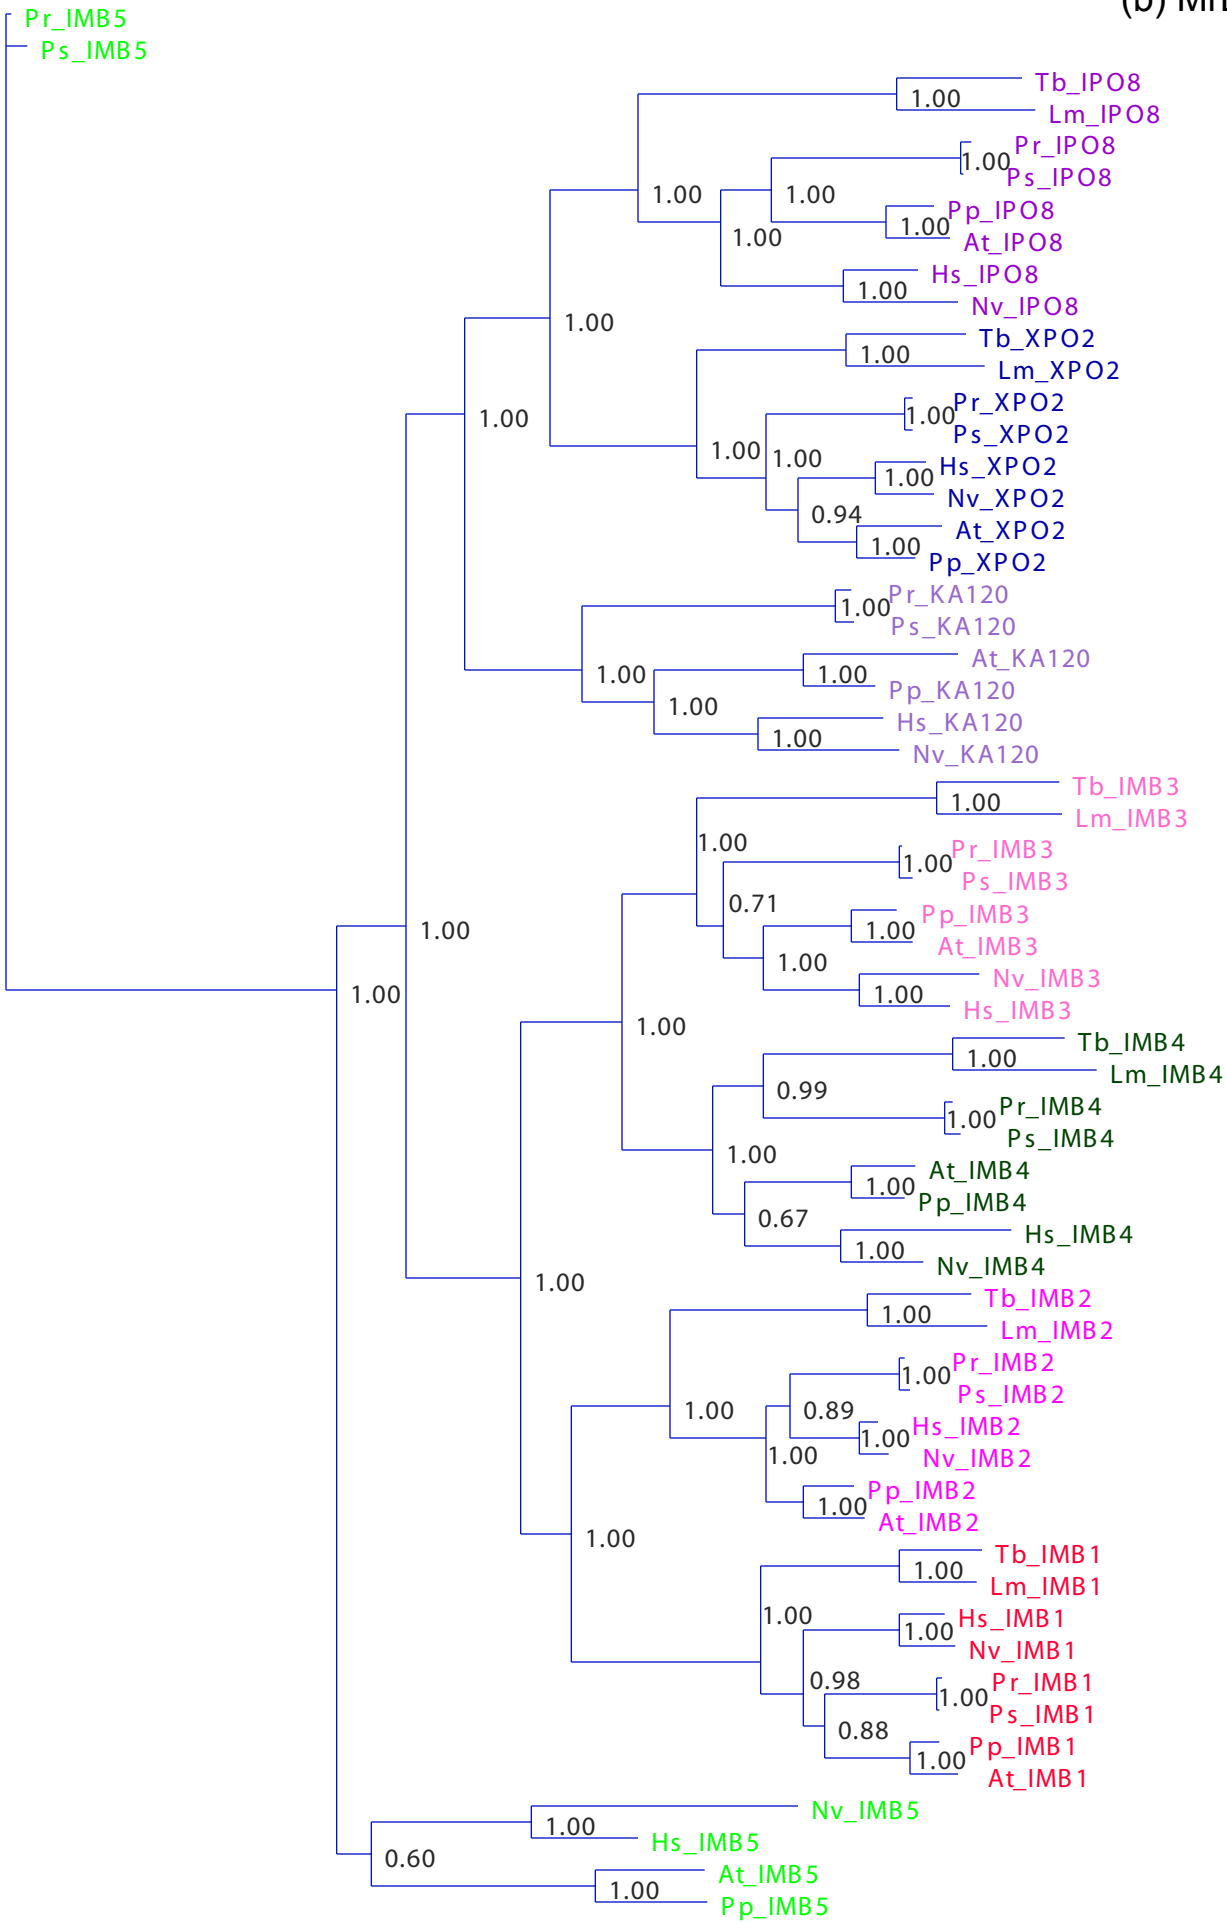

(b) PhyML

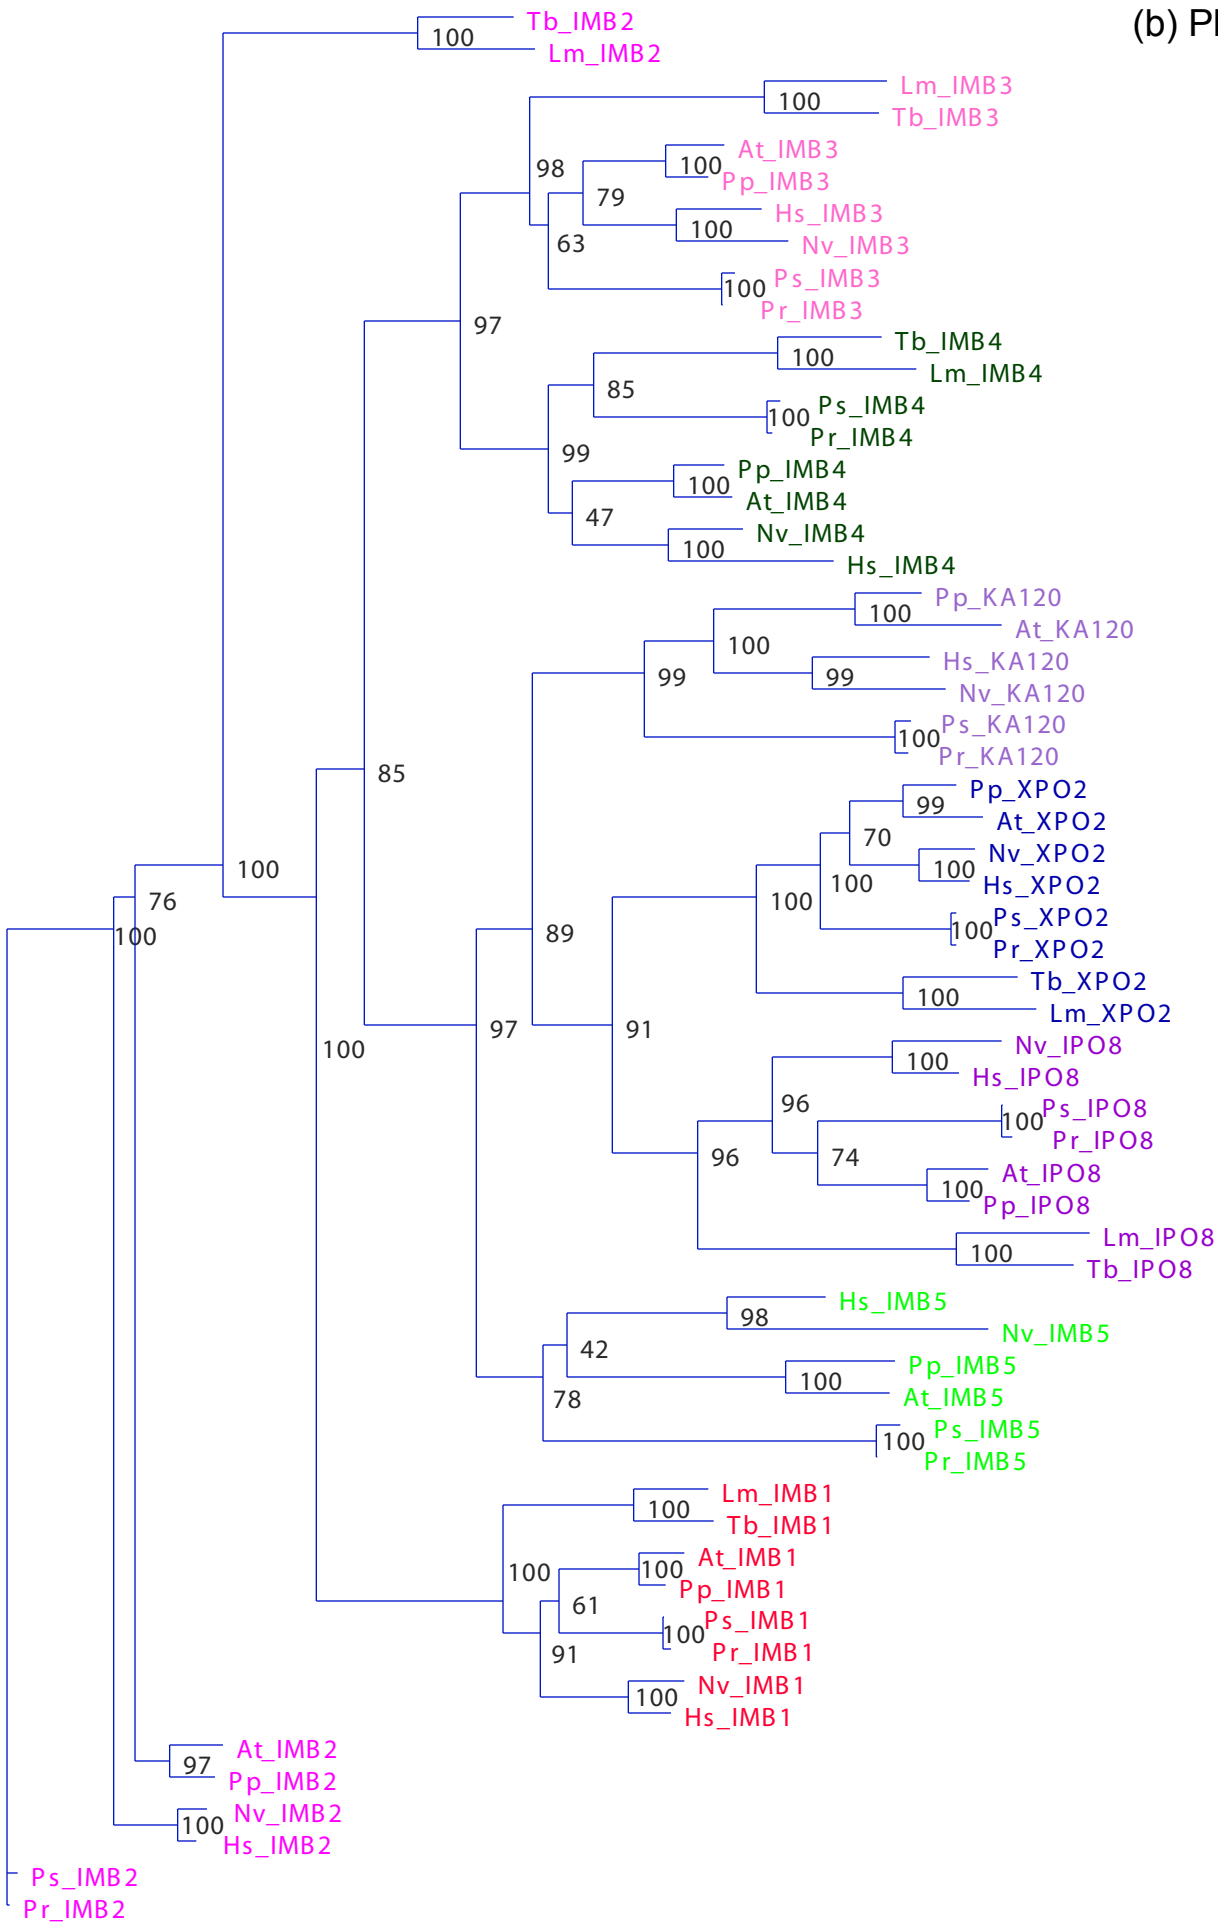



(c)

Three supergroups, all subfamilies not in (b)

(so the branch leading to the members of the (b) analysis is missing).

Conclusions:

XPO6 forms a clade with (XPO4, XPO7).

Branch order of (TNPO3, XPO5, XPOT, XPO1) not established.

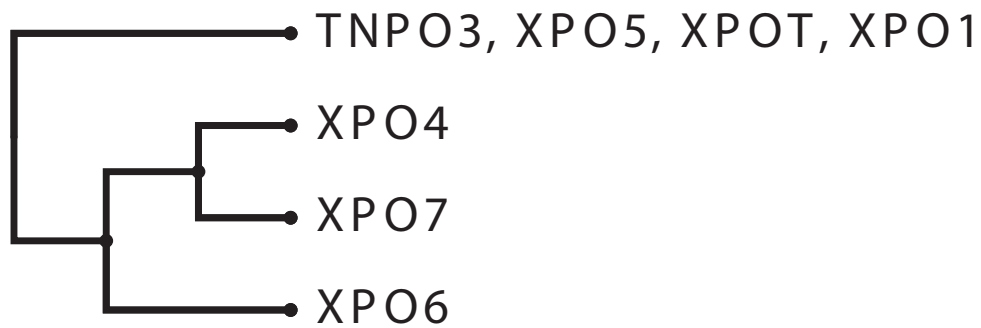

(c) MrBayes

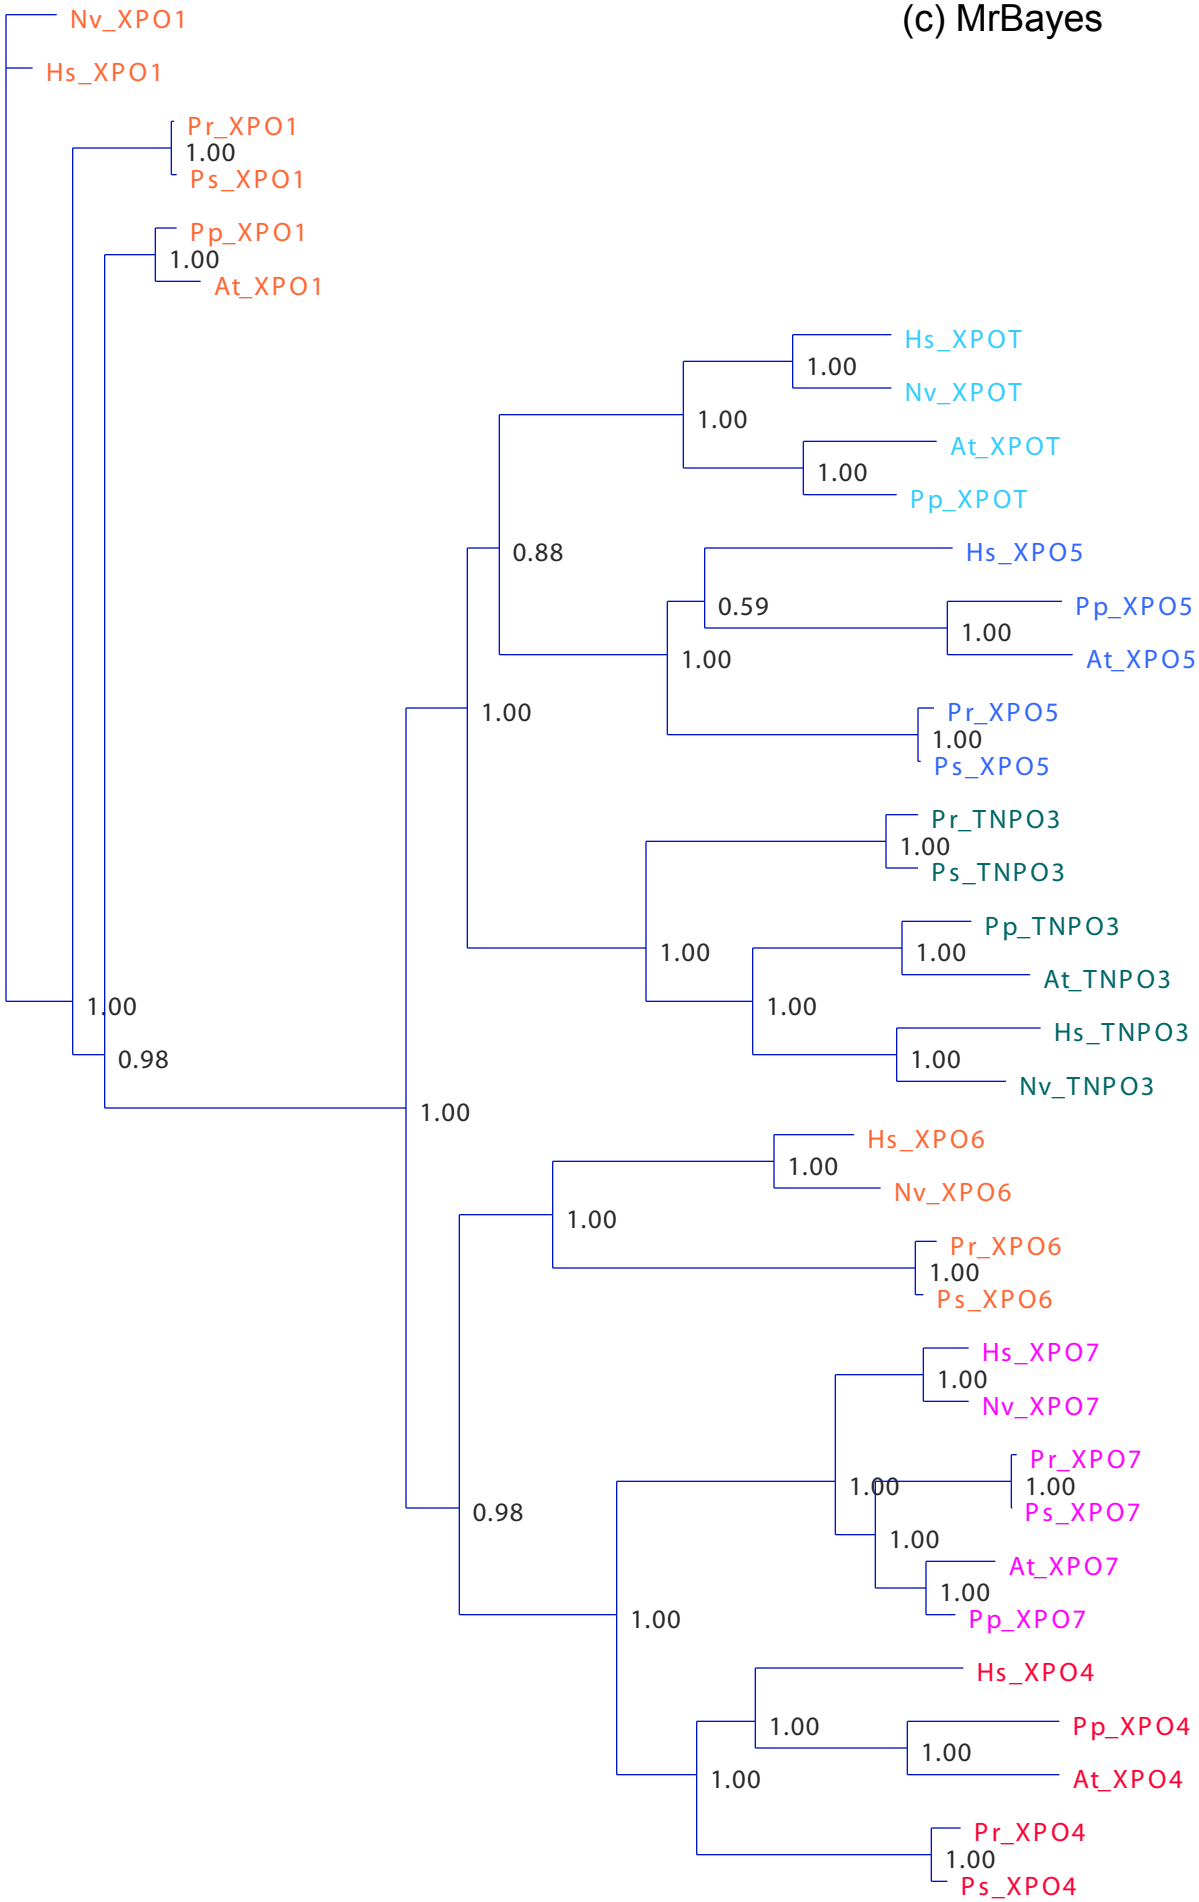

(c) PhyML

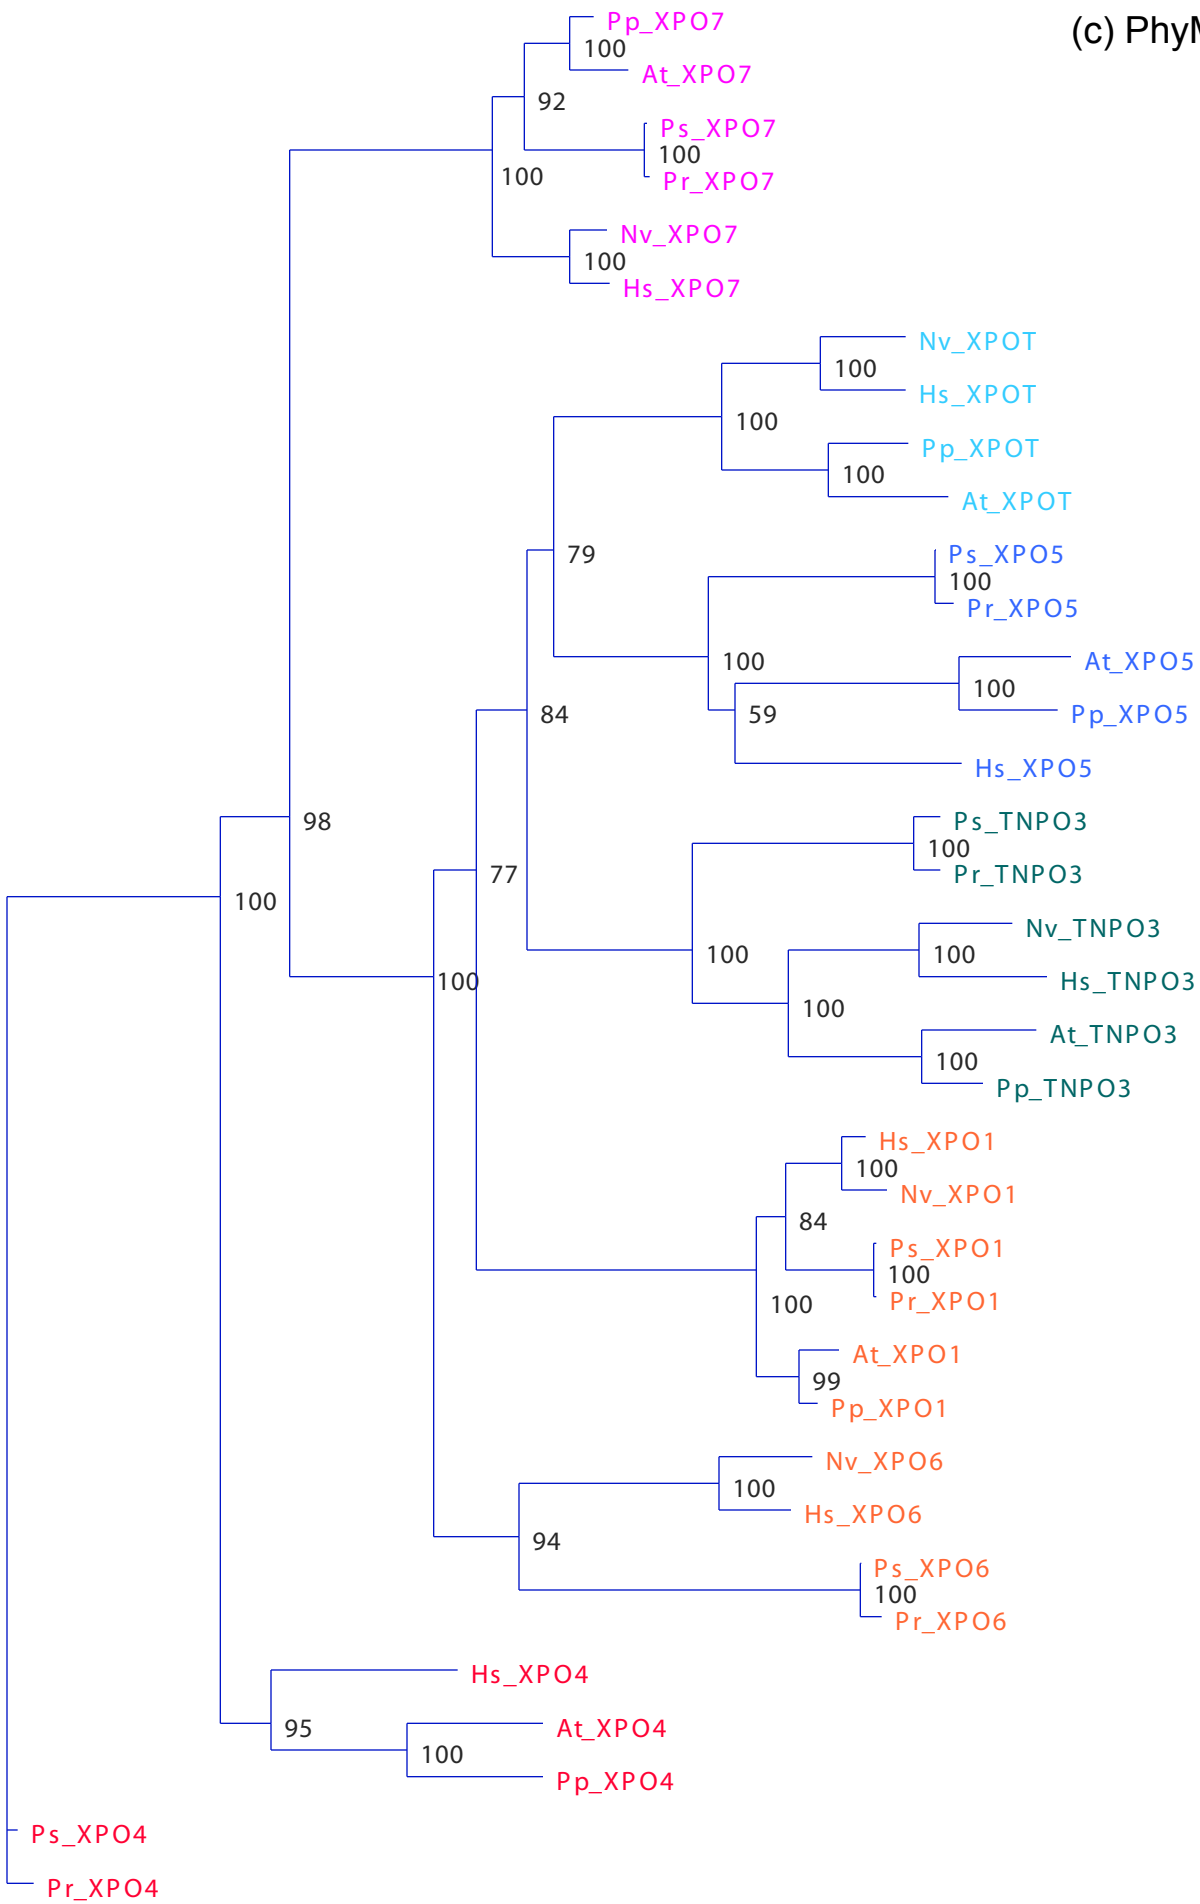

(d)

Removed XPO4 and XPO6 subfamilies from (c) in order to establish branching order in (TNPO3, XPO5, XPOT, XPO1) clade.

Three supergroups.

Conclusion:

branch order for TNPO3, XPO5, XPOT, XPO1 established

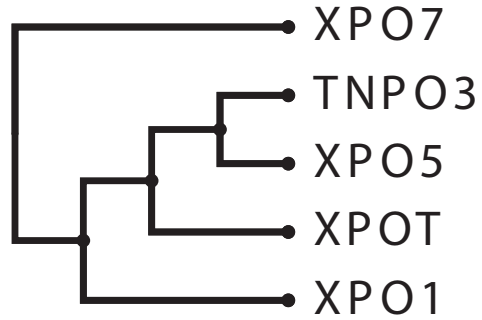

(d) MrBayes

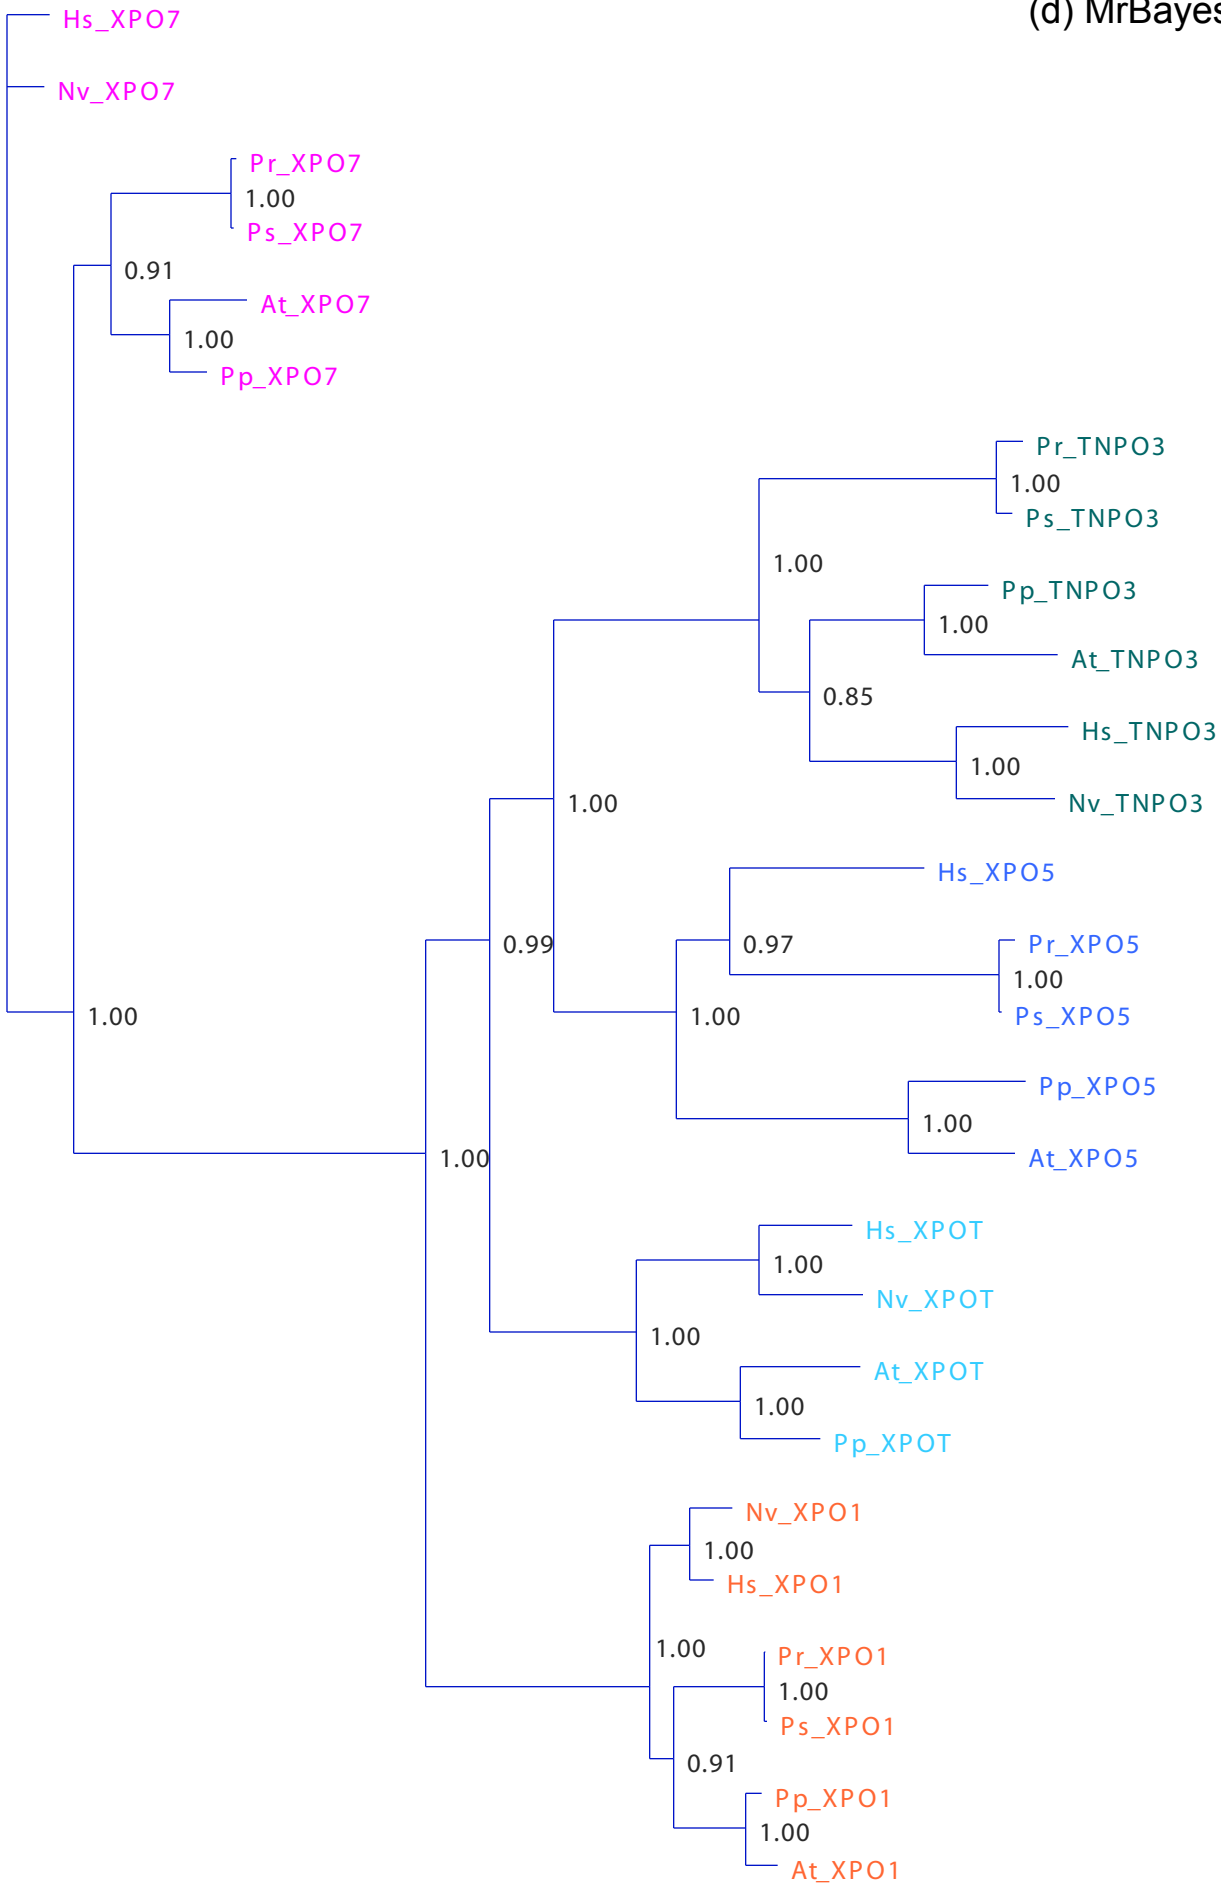

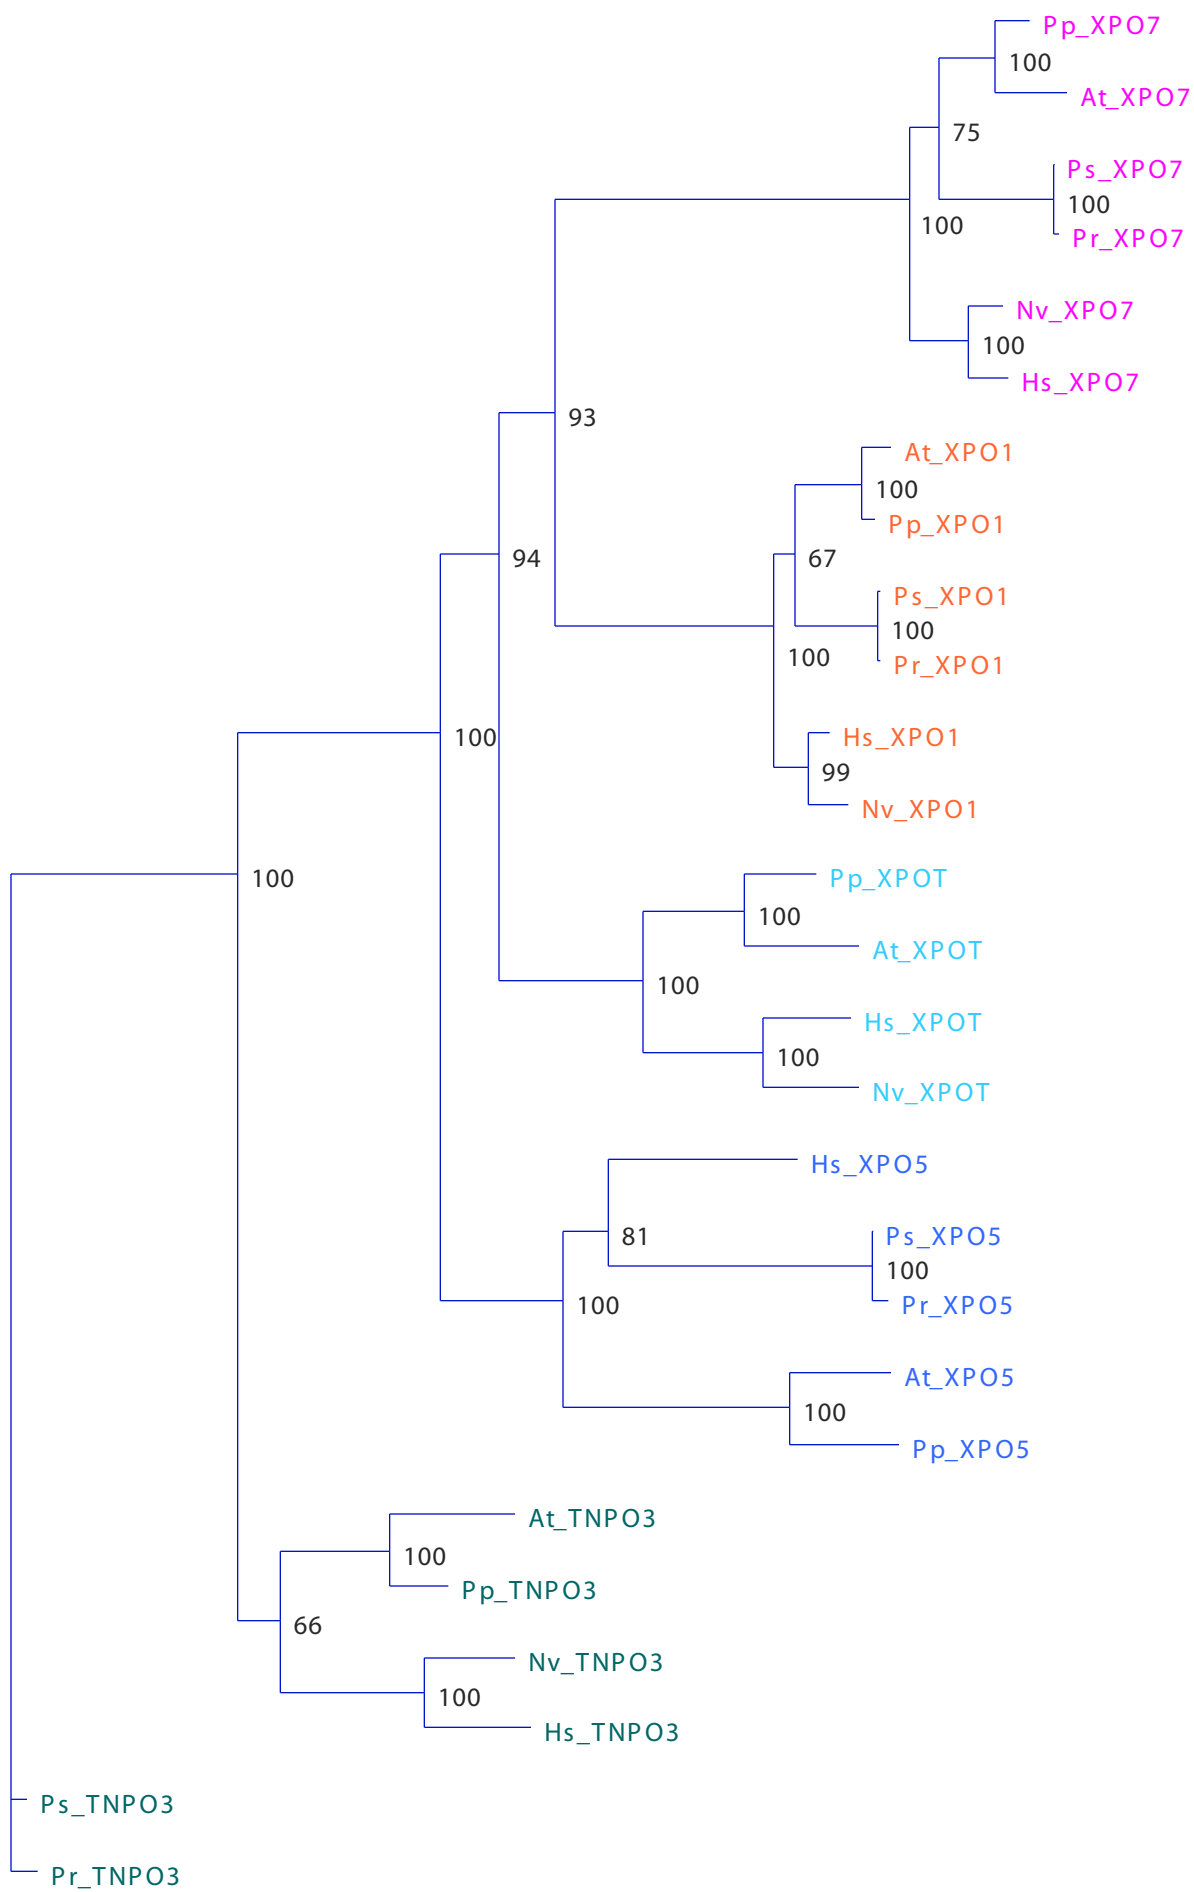

(e)

Four supergroups, XPO1, XPO2, XPO6, XPO7 subfamilies.

XPO1 represents (TNPO3, XPO5, XPOT, XPO1) clade

XPO2 represents (IMB1, IMB2, IMB3, IMB4, IMB5, KA120, IPO8, XPO2) clade

XPO7 represents (XPO4, XPO7) clade

Conclusion:

branch order for XPO1, XPO2, XPO6, XPO7 established.

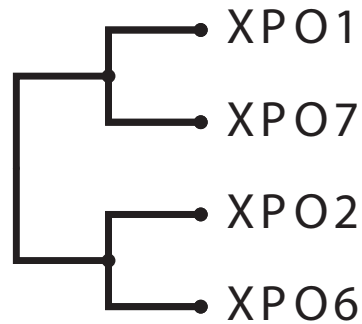

(e) MrBayes

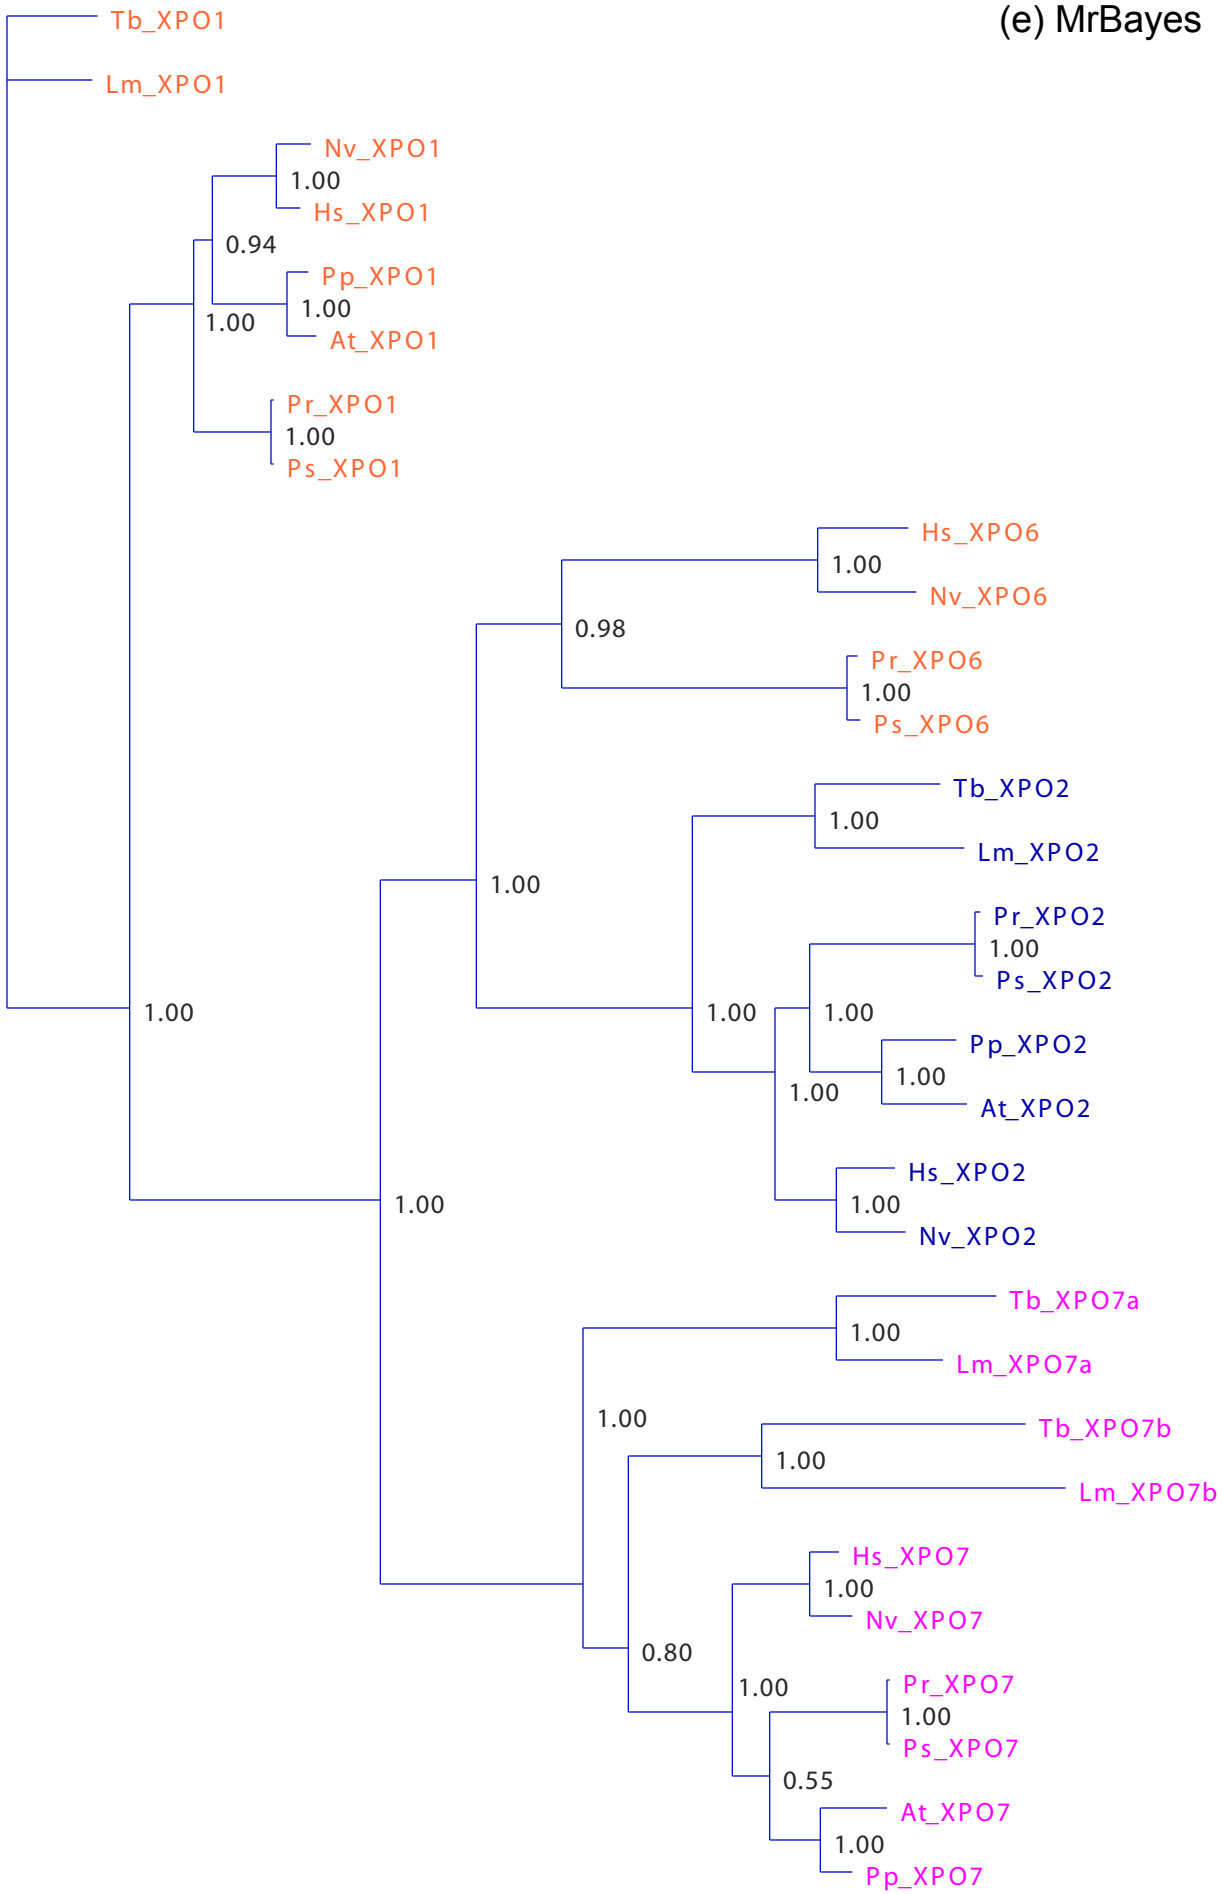



(e) PhyML

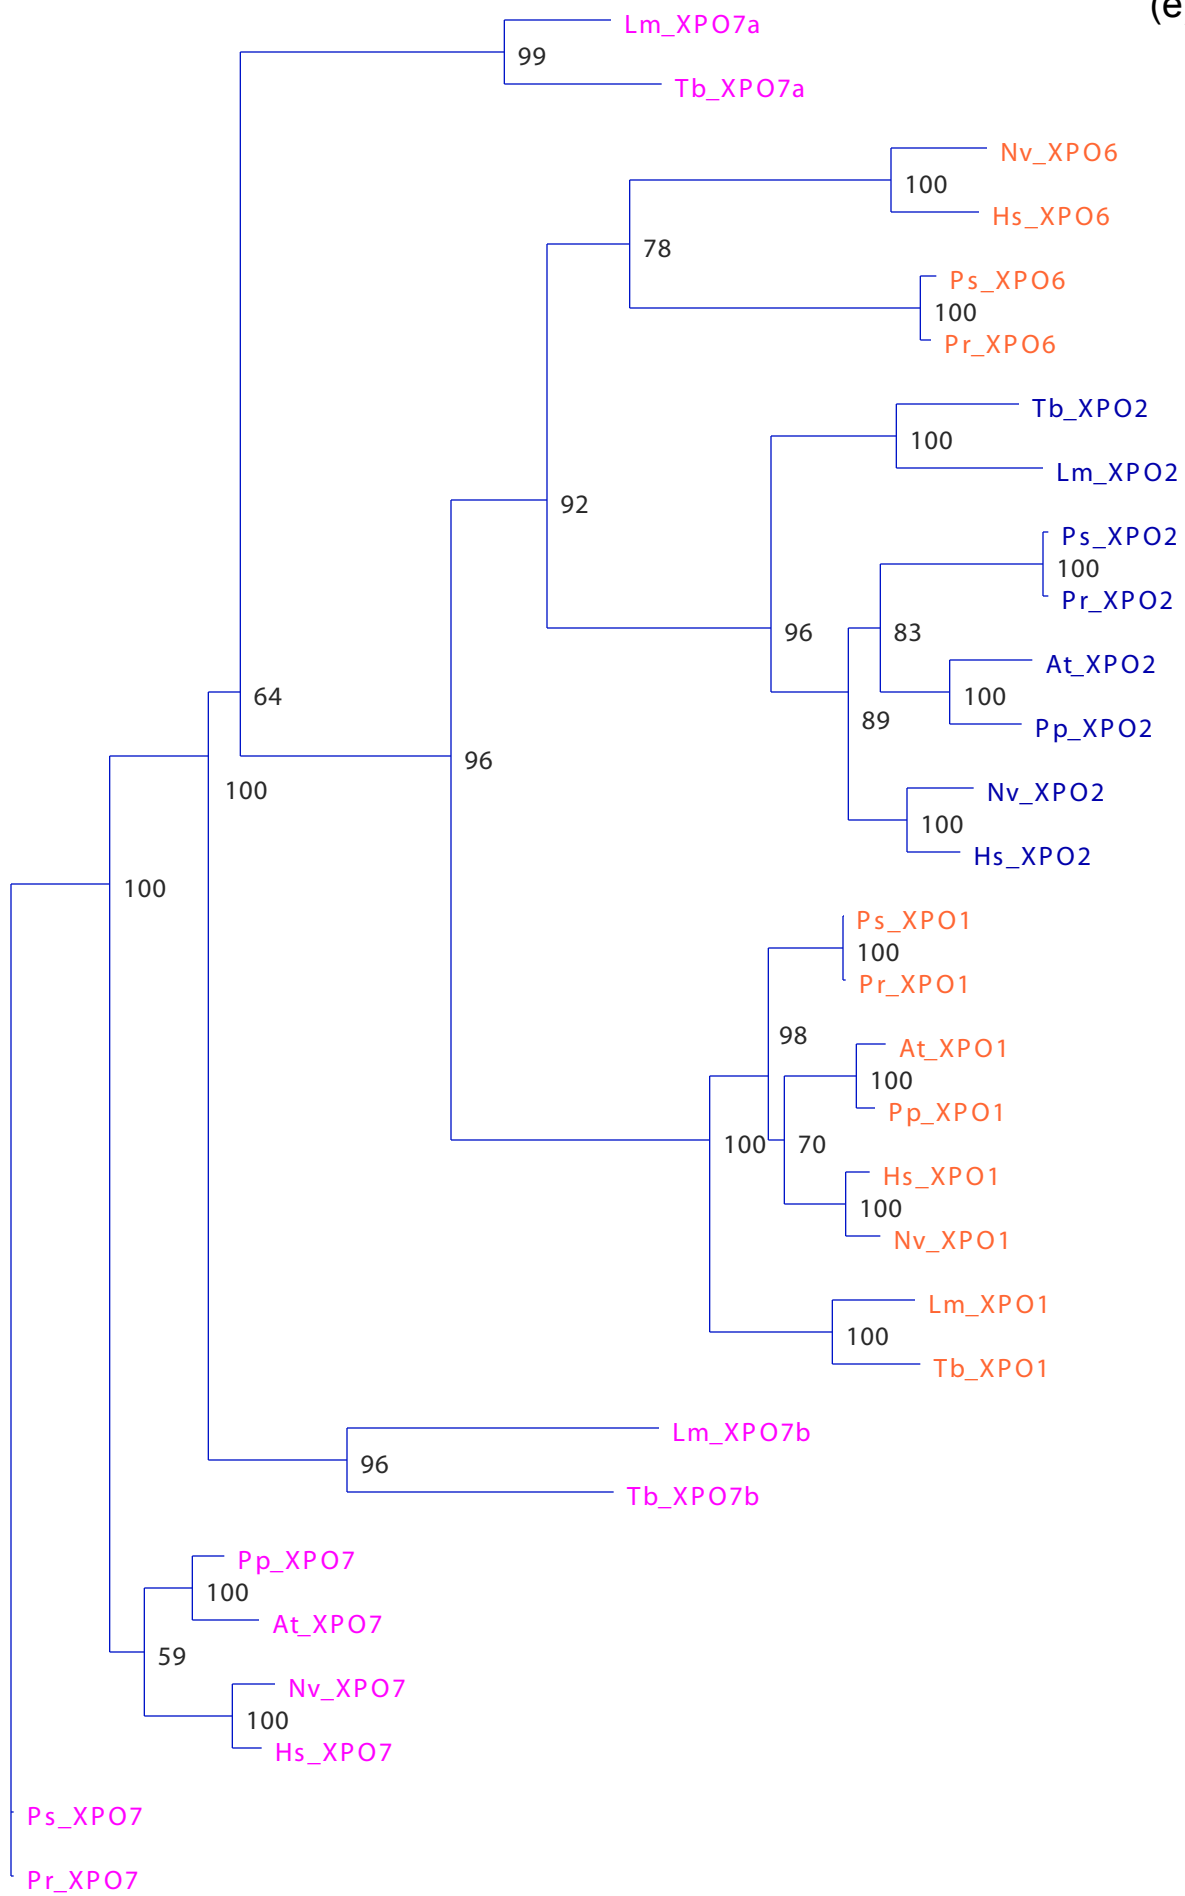

Supplement: pone.0019308.s001.pdf [file pone.0019308.s001.pdf]
